# Supplementary material
Source: Springer Nature journal article supplement (https://www.springermedizin.de/resource/supplementary/13041_2013_200_MOESM9_ESM.pdf/25657728)

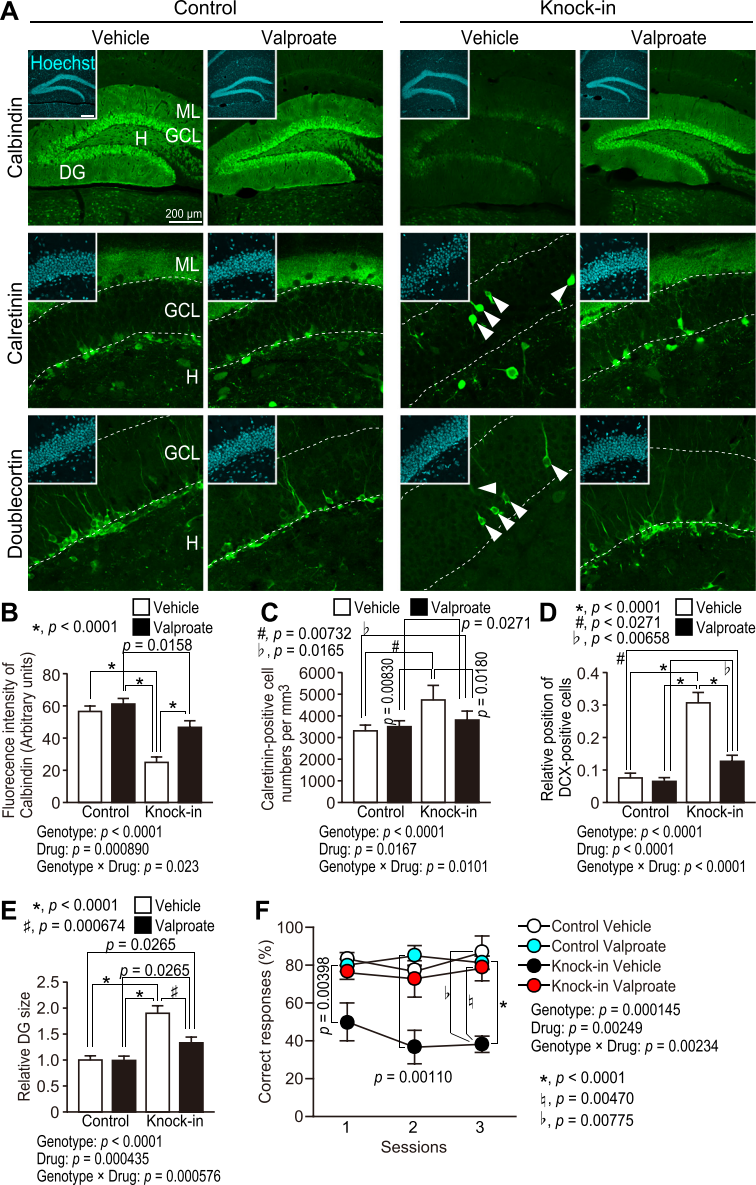

Supplement: MOESM9 [file 25657728]
